# Supplementary material for: Different Prognostic Values of Dual-Time-Point FDG PET/CT Imaging Features According to Treatment Modality in Patients with Non-Small Cell Lung Cancer
Source: MDPI journal article supplement (doi:10.3390/tomography8020087), 2022-04-08
Supplement: s1 [file s1]

Table S1. Definition of SUV histogram-based first-order PET parameters.

| PET parameters | Definition                                                                                                                                                                                                                                                                                                                                                                         |
|----------------|------------------------------------------------------------------------------------------------------------------------------------------------------------------------------------------------------------------------------------------------------------------------------------------------------------------------------------------------------------------------------------|
| Skewness       | <p>Asymmetry of the grey-level distribution in the histogram</p> $\text{Skewness} = \frac{[\frac{1}{N} \sum_i (I(i) - \text{Iavg})^3]}{[\frac{1}{N} \sum_i (I(i) - \text{Iavg})^2]^{\frac{3}{2}}}$ <p>I(i) corresponds to the number of voxels with intensity i, N the total number of voxels in the volume of interest, and Iavg the average of grey-levels</p>                   |
| Kurtosis       | <p>Shape of the grey-level distribution in the histogram relative to a normal distribution</p> $\text{Kurtosis} = \frac{[\frac{1}{N} \sum_i (I(i) - \text{Iavg})^4]}{[\frac{1}{N} \sum_i (I(i) - \text{Iavg})^2]^2}$ <p>I(i) corresponds to the number of voxels with intensity i, N the total number of voxels in the volume of interest, and Iavg the average of grey-levels</p> |
| Entropy        | <p>Randomness of the grey-level distribution in the histogram</p> $\text{Entropy} = - \sum_i p(i) \log_2(p(i) + \varepsilon)$ <p>P(i) is the probability of occurrence of voxels with intensity i and <math>\varepsilon = 2e - 16</math></p>                                                                                                                                       |
| Energy         | <p>Uniformity of the grey-level distribution in the histogram</p> $\text{Energy} = \sum_i p(i)^2$ <p>P(i) is the probability of occurrence of voxels with intensity i</p>                                                                                                                                                                                                          |
